# Supplementary material
Source: Springer Nature journal article supplement (https://www.springermedizin.de/resource/supplementary/12913_2011_1921_MOESM1_ESM.pdf/9529690)

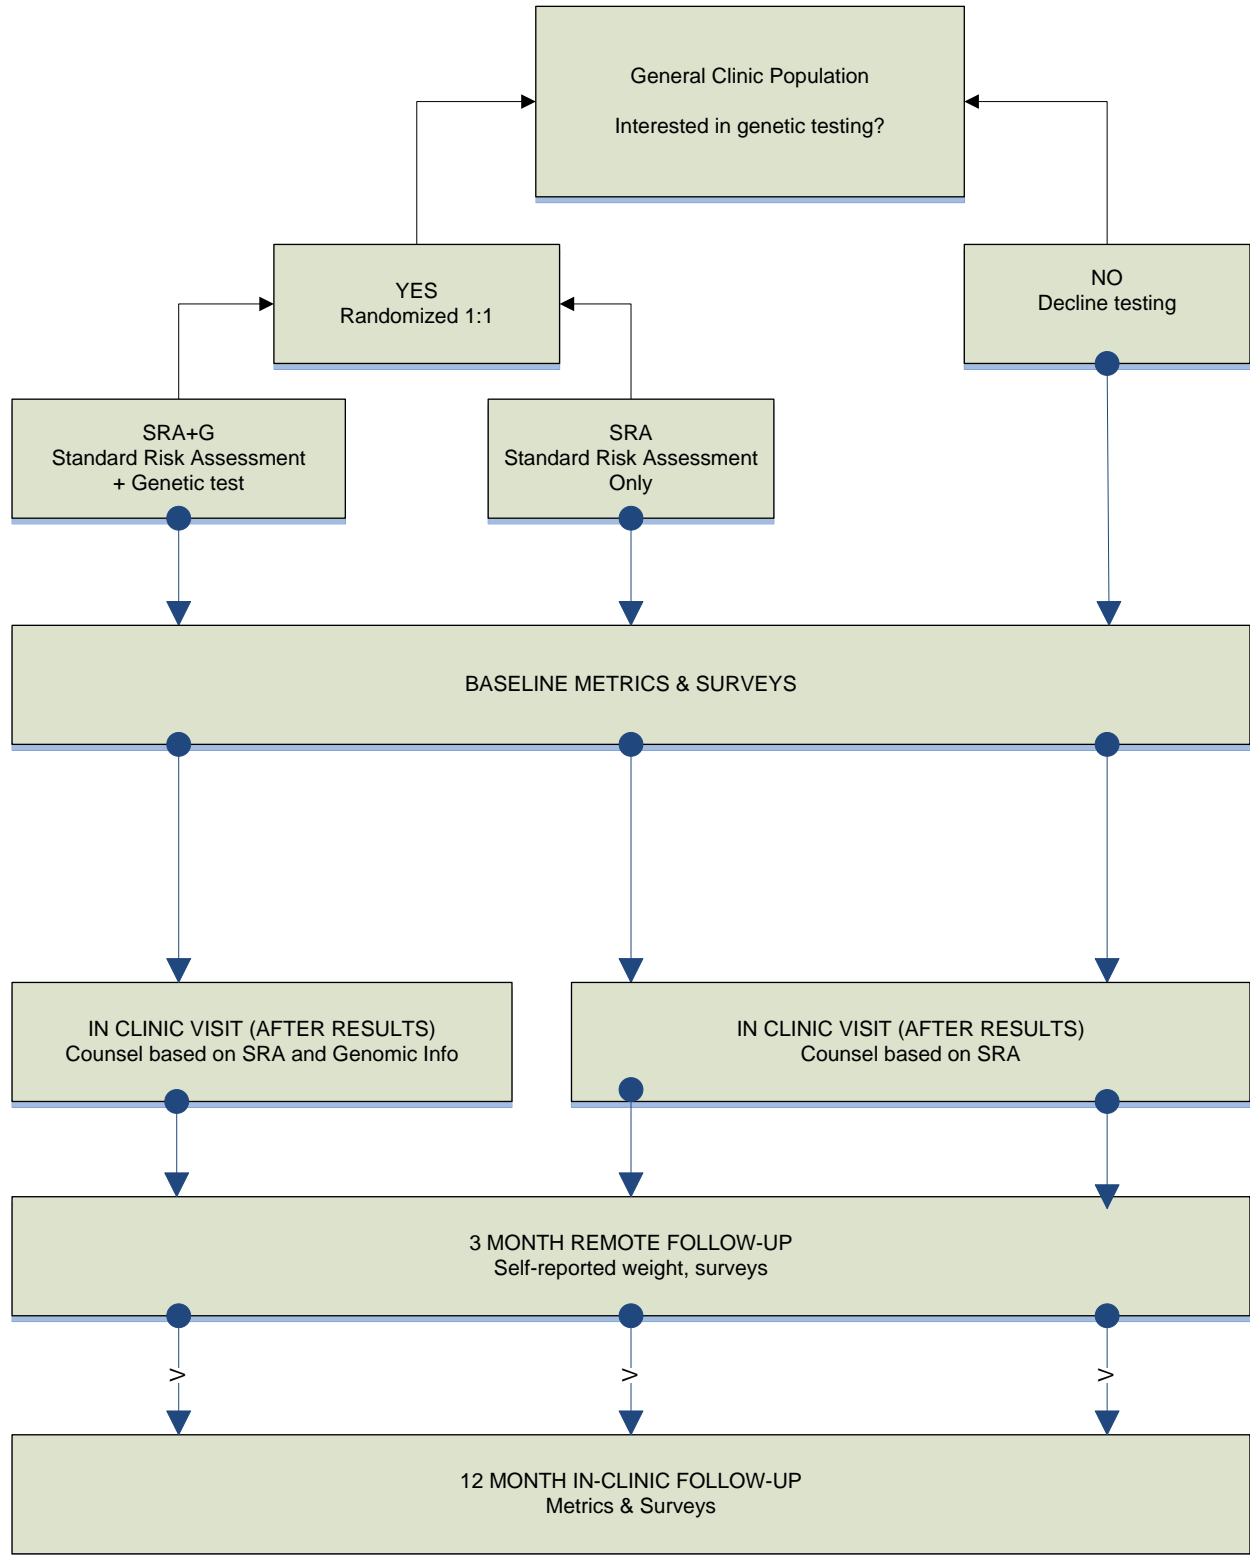

Supplement: MOESM1 [file 9529690]
